# Supplementary material for: Genomic tools for durum wheat breeding: de novo assembly of Svevo transcriptome and SNP discovery in elite germplasm
Source: PubMed Central journal article supplement (PMC6456968; doi:10.1186/s12864-019-5645-x), 2019-04-10

# Assembly contigs size distribution

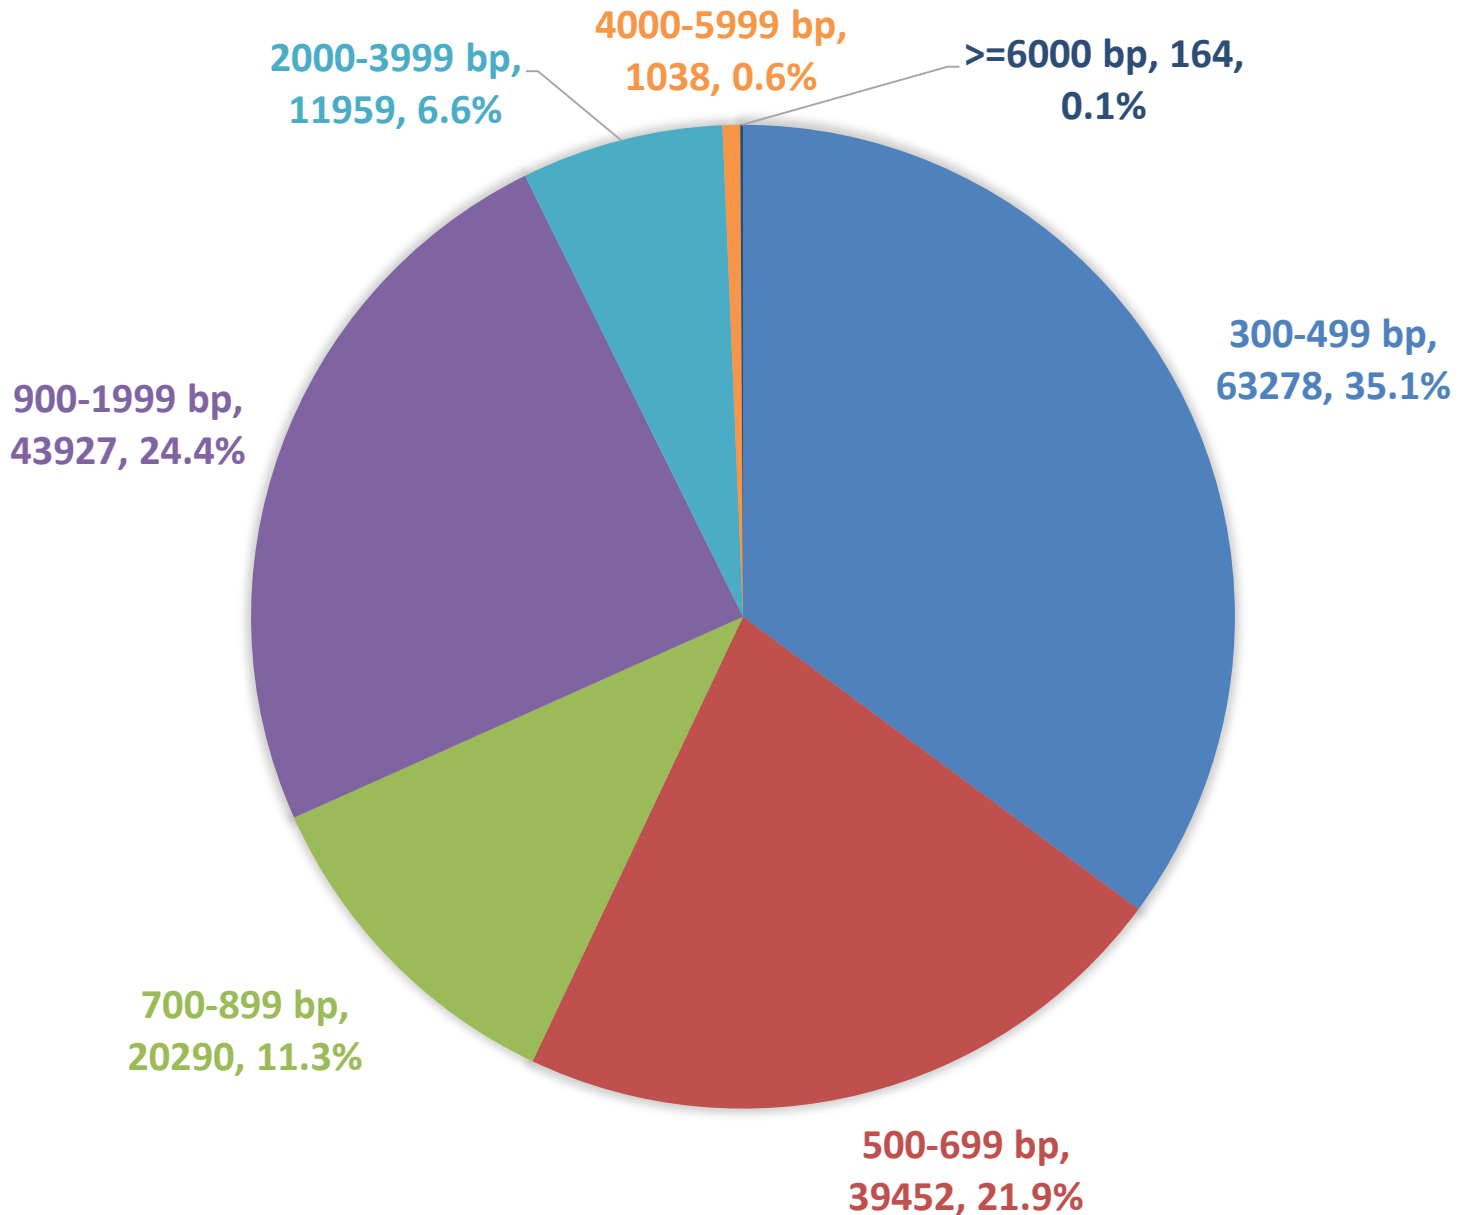

Supplement: 12864_2019_5645_MOESM4_ESM.pdf [file 12864_2019_5645_MOESM4_ESM.pdf]
