# Supplementary material for: Genomic tools for durum wheat breeding: de novo assembly of Svevo transcriptome and SNP discovery in elite germplasm
Source: PubMed Central journal article supplement (PMC6456968; doi:10.1186/s12864-019-5645-x), 2019-04-10

**A****Percentage of contigs that represent >80% of FLcDNAs**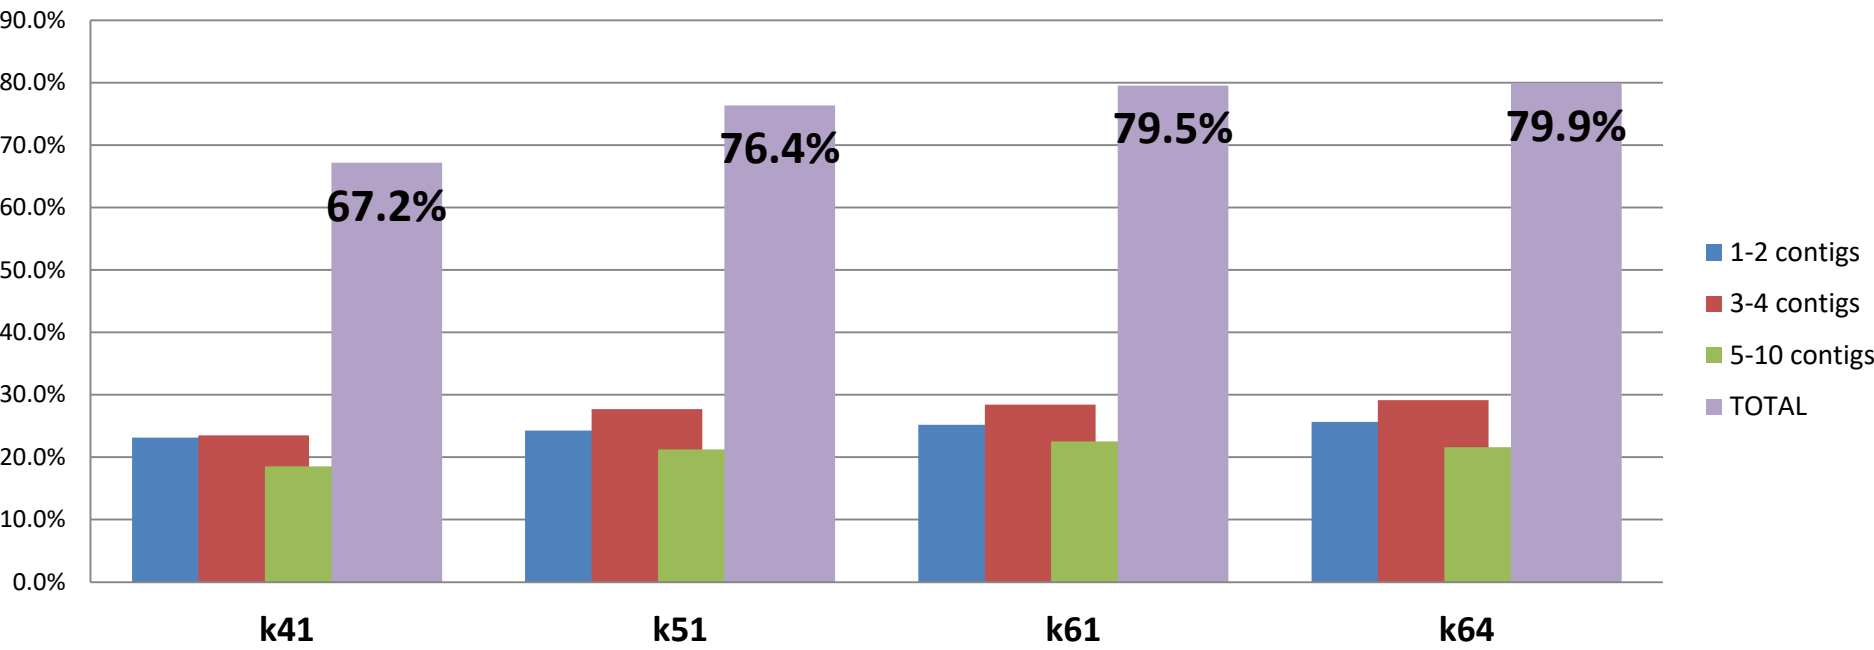**B****Percentage of contigs that represent >80% of chr 3B CDS**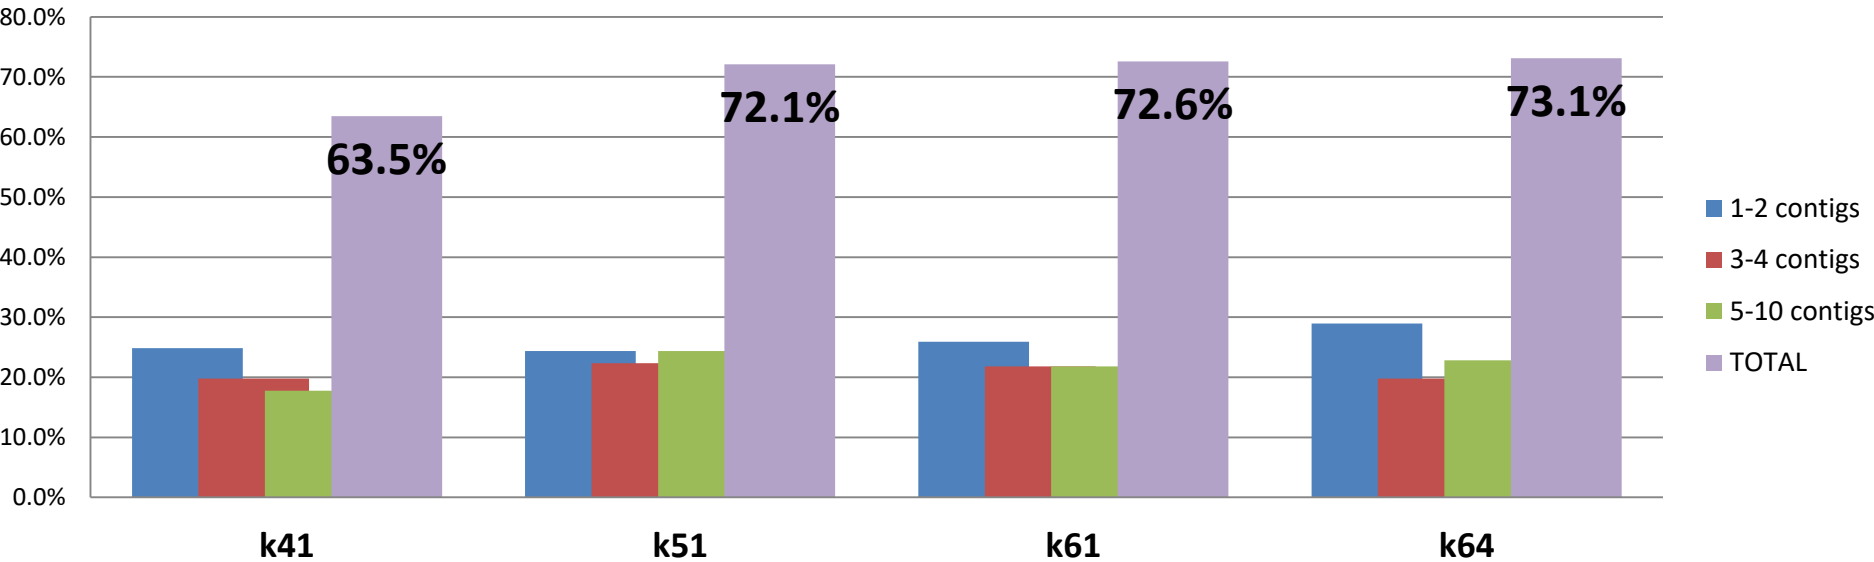

Supplement: 12864_2019_5645_MOESM6_ESM.pdf [file 12864_2019_5645_MOESM6_ESM.pdf]
