# Supplementary material for: Genomic tools for durum wheat breeding: de novo assembly of Svevo transcriptome and SNP discovery in elite germplasm
Source: PubMed Central journal article supplement (PMC6456968; doi:10.1186/s12864-019-5645-x), 2019-04-10

# TRIUR3\_04135\_Leaf

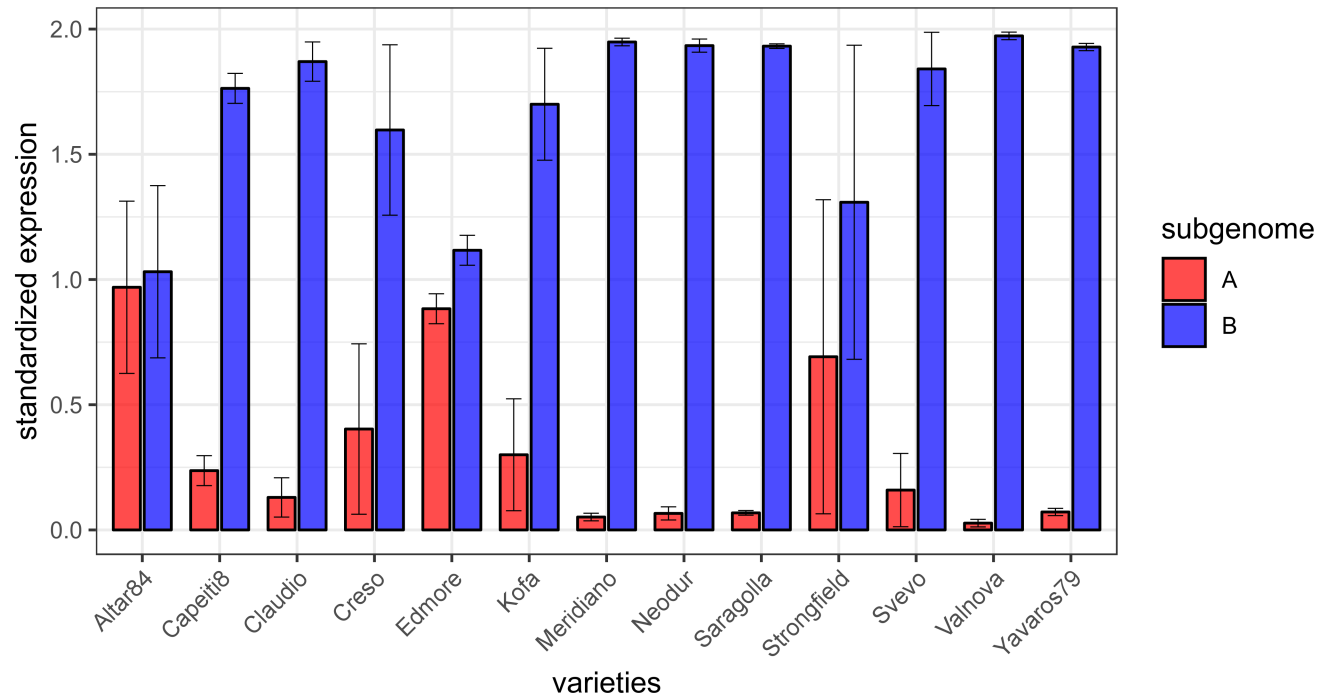

# TRIUR3\_04135\_Root

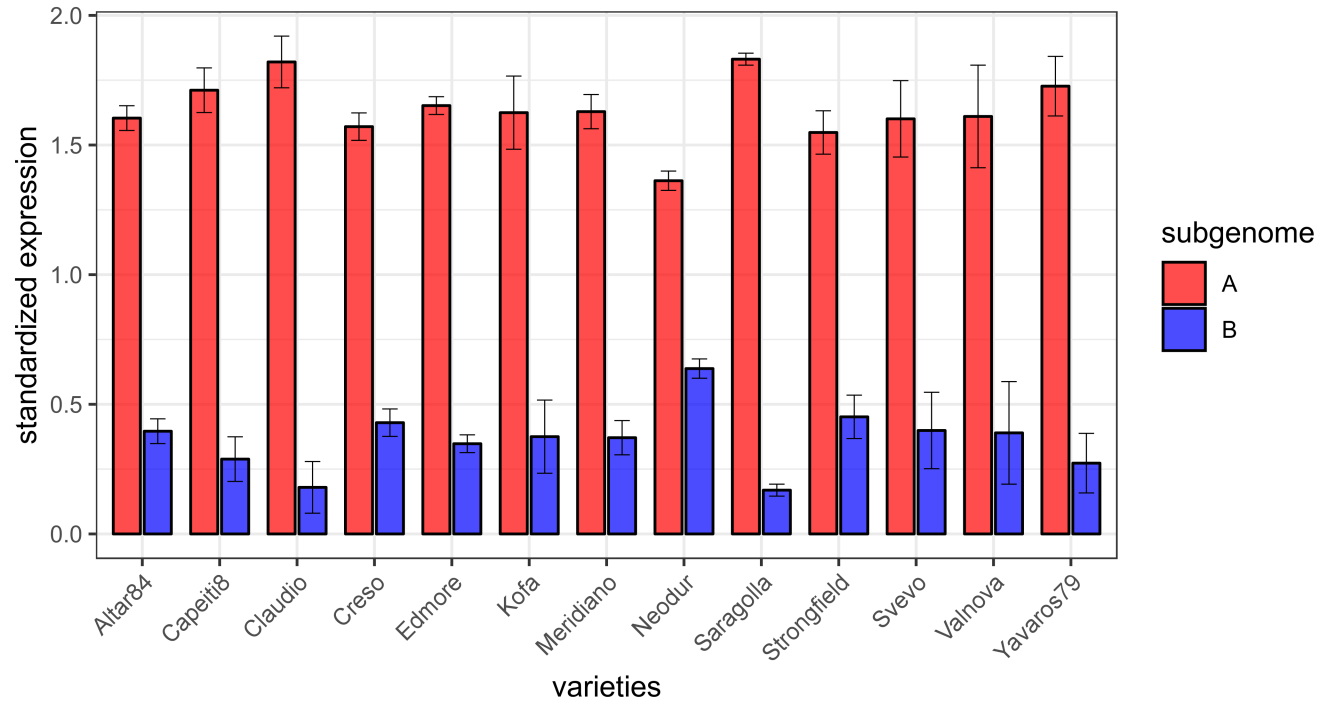

# TRIUR3\_14772\_L+R

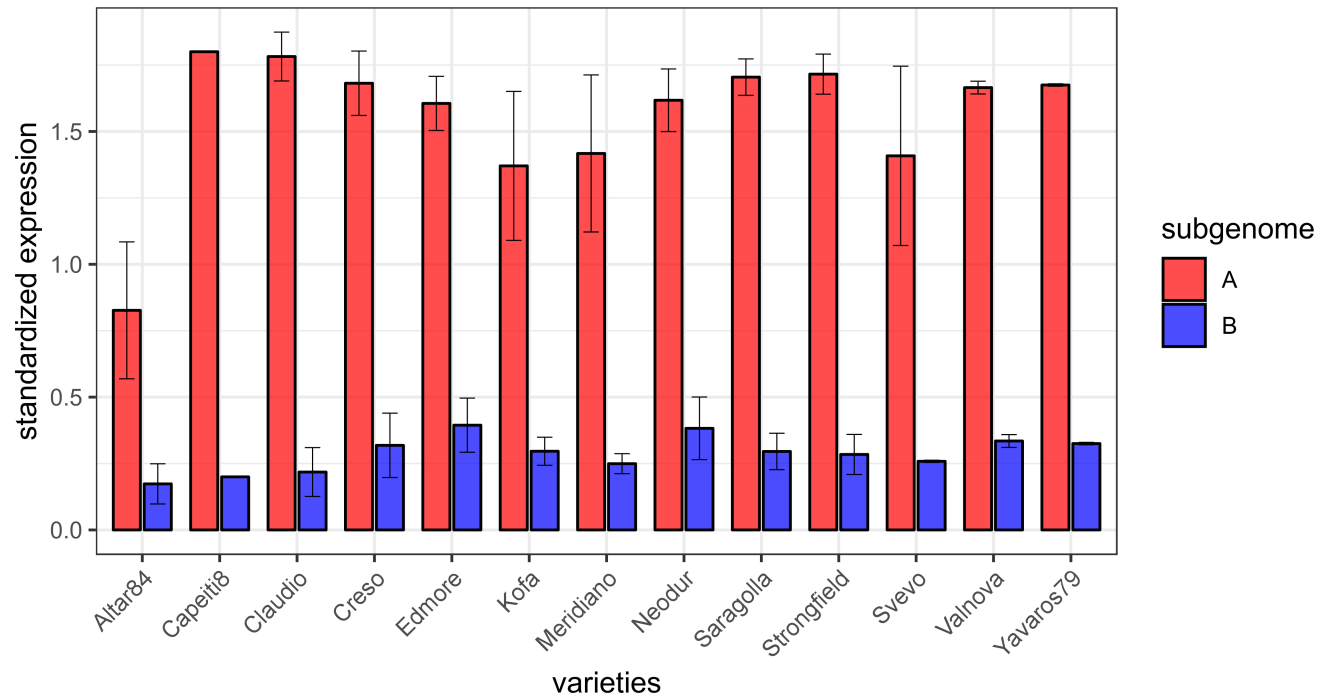

# TRIUR3\_09011\_L+R

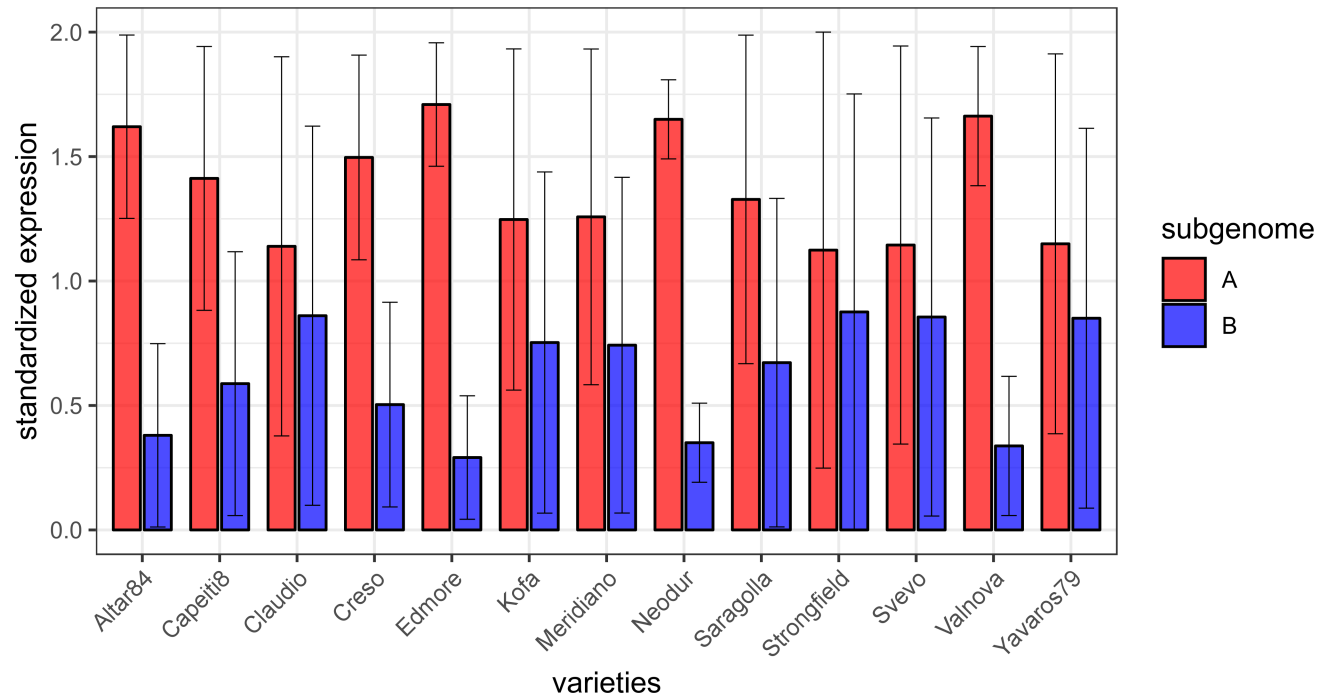

# TRIUR3\_06137\_L+R

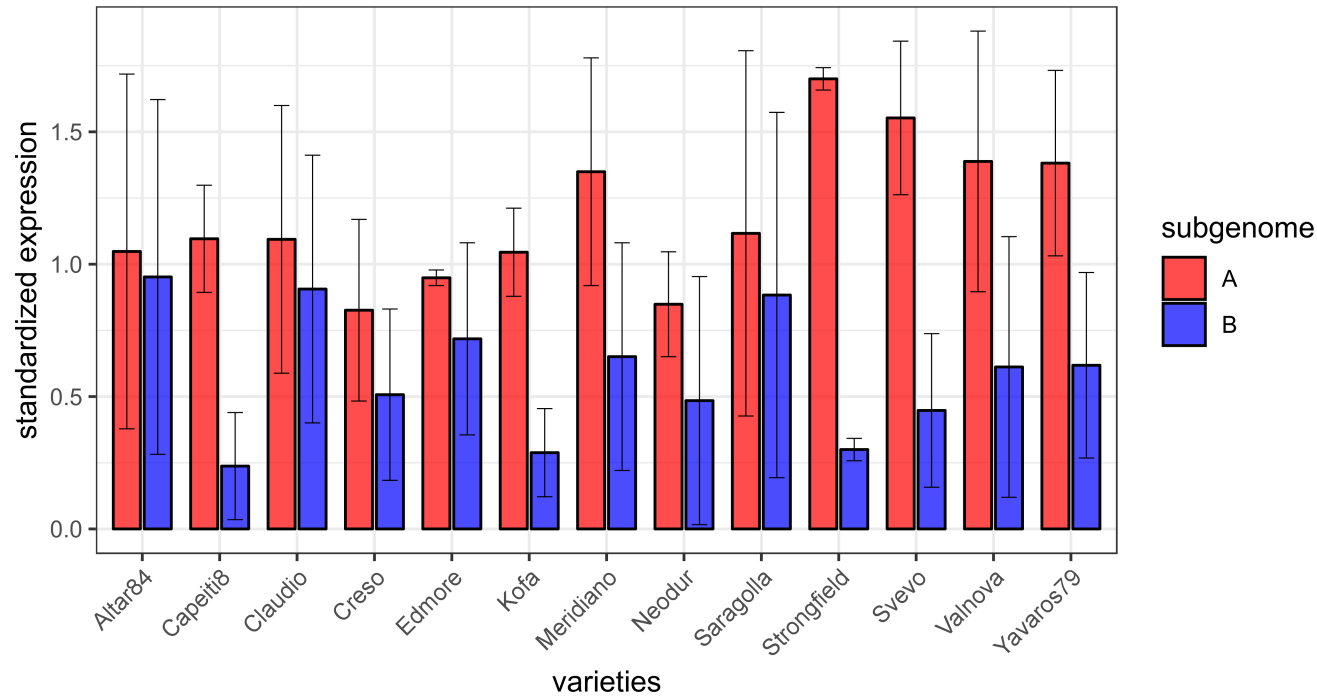

# TRIUR3\_05979\_L+R

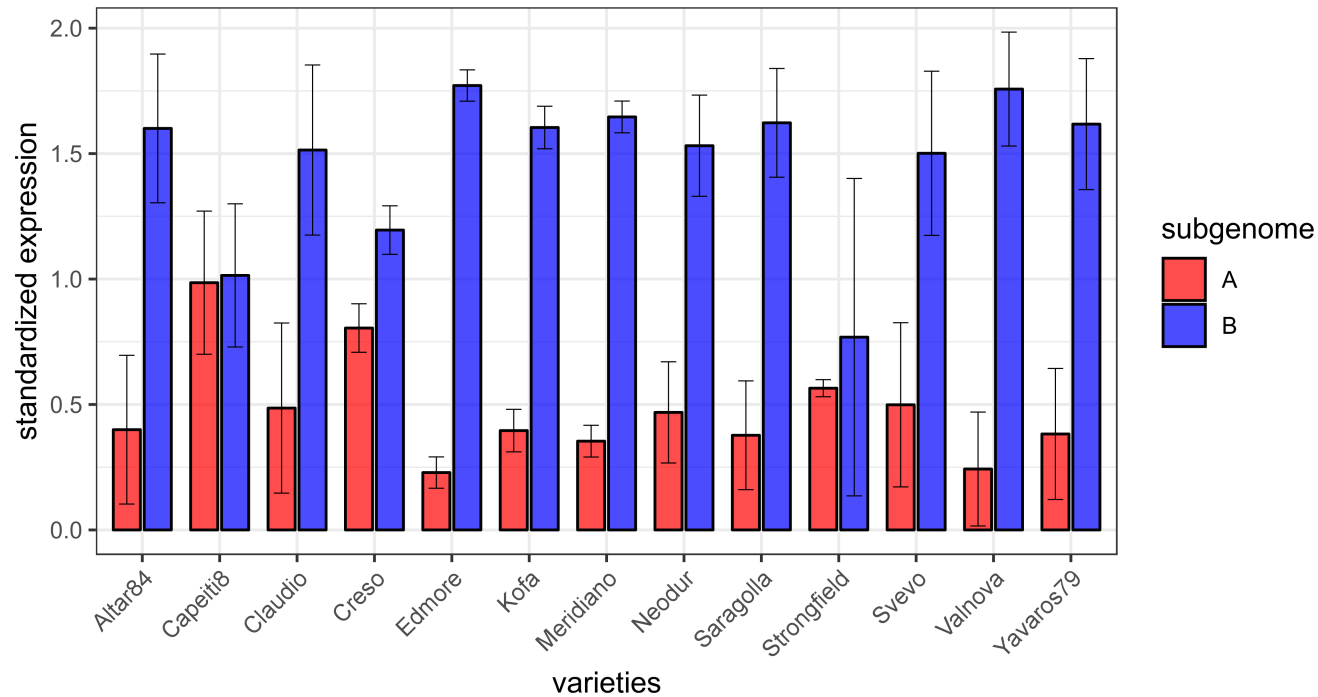

# TRIUR3\_07762\_L+R

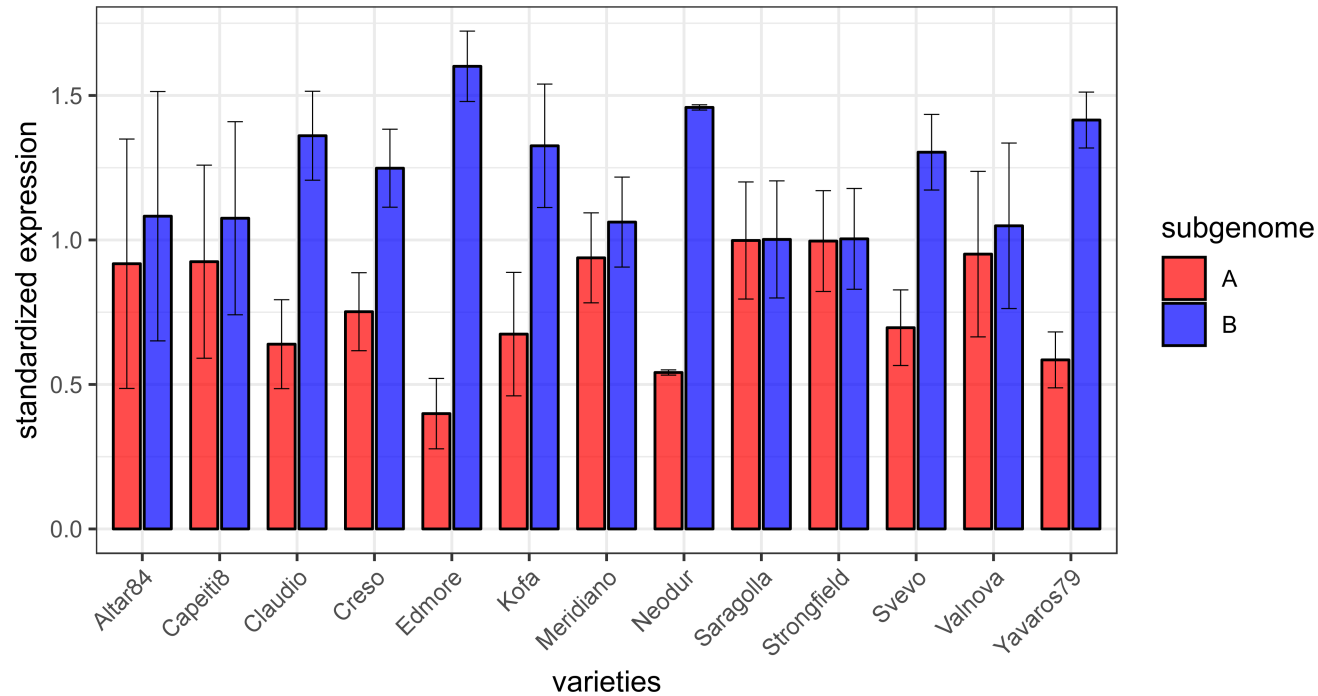

# TRIUR3\_15361\_L+R

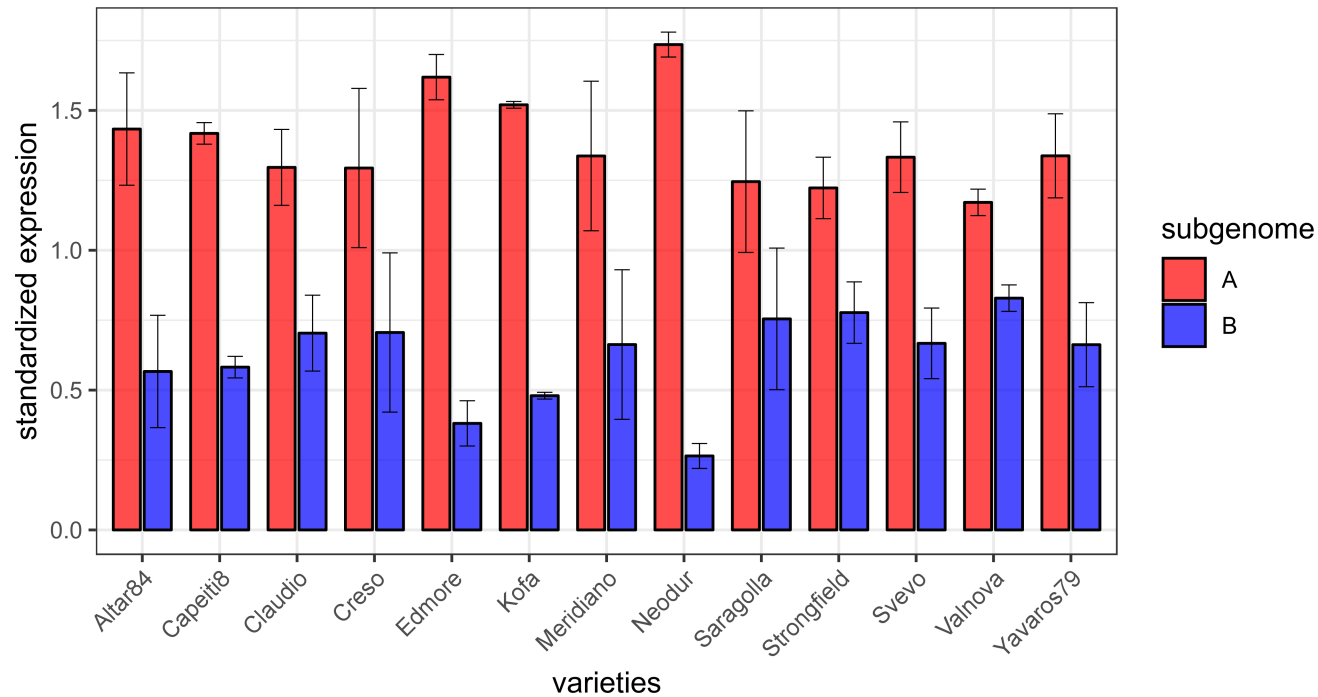



# TRIUR3\_14342\_L+R

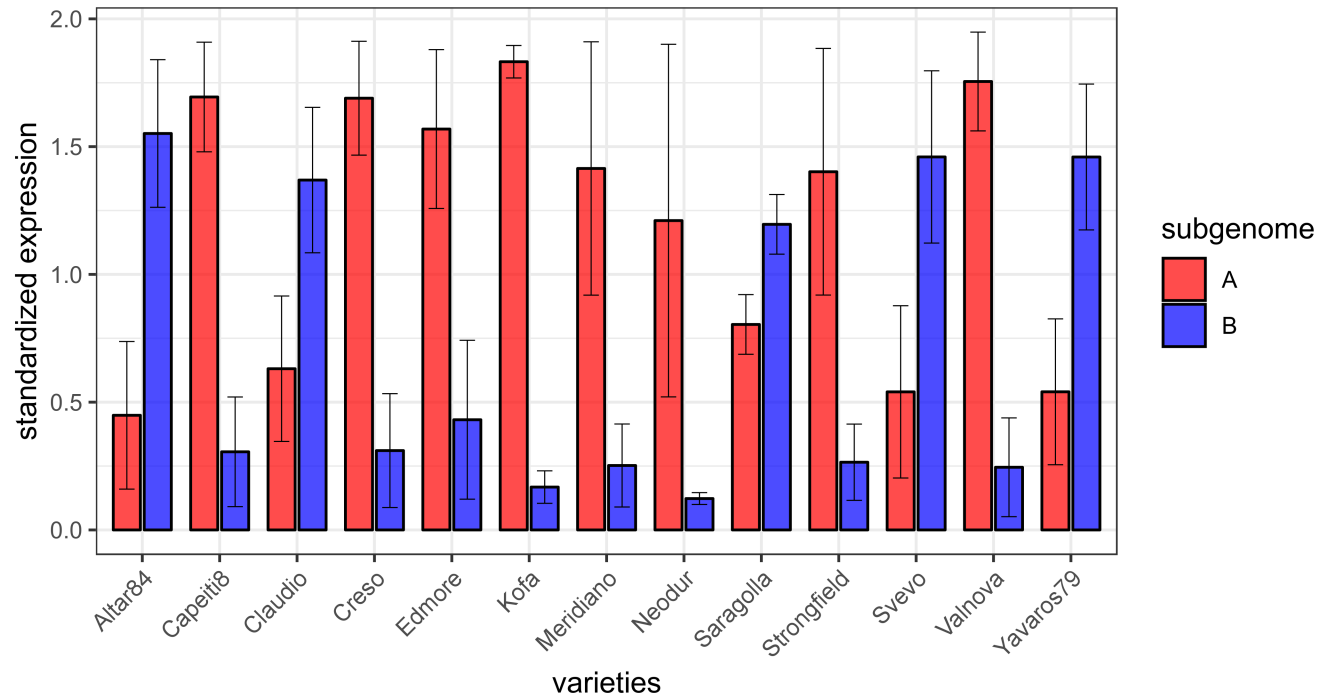

Supplement: 12864_2019_5645_MOESM19_ESM.pdf [file 12864_2019_5645_MOESM19_ESM.pdf]
